# Supplementary material
Source: ML conference proceedings conference paper supplement (https://proceedings.neurips.cc/paper_files/paper/2020/hash/3261769be720b0fefbfffec05e9d9202-Abstract.html)
Supplement: Supplementary file [file 3261769be720b0fefbfffec05e9d9202-Supplemental.zip]

---

# Supplementary file for “Randomized tests for high-dimensional regression: A more efficient and powerful solution”

---

Anonymous Author(s)

Affiliation

Address

email

## Abstract

1 This document provides the complete proofs and additional details for the main  
2 results stated in the NeurIPS submission titled “Randomized tests for high-  
3 dimensional regression: A more efficient and powerful solution”.

## 4 Contents

|    |                                                |           |
|----|------------------------------------------------|-----------|
| 5  | <b>A Relaxation of Gaussian Assumptions</b>    | <b>2</b>  |
| 6  | <b>B Formal version of Definition 1</b>        | <b>2</b>  |
| 7  | <b>C Proof of results in main text</b>         | <b>3</b>  |
| 8  | C.1 Proof of Theorem 1 . . . . .               | 3         |
| 9  | C.2 Proof of Lemma 1 . . . . .                 | 3         |
| 10 | C.3 Well-definedness of Algorithm 1 . . . . .  | 5         |
| 11 | C.4 Proof of Proposition 1 . . . . .           | 5         |
| 12 | C.5 Details of Example 1 . . . . .             | 6         |
| 13 | C.6 Proof of Theorem 2 . . . . .               | 7         |
| 14 | C.6.1 Lower bound . . . . .                    | 7         |
| 15 | C.6.2 Upper bound . . . . .                    | 7         |
| 16 | C.7 Proof of Theorem 3 . . . . .               | 9         |
| 17 | C.8 Details of Examples 2 . . . . .            | 9         |
| 18 | C.9 Proof of Lemma C.4 . . . . .               | 10        |
| 19 | C.10 Proof of Lemma C.5 . . . . .              | 12        |
| 20 | <b>D Auxiliary proofs</b>                      | <b>15</b> |
| 21 | D.1 Proof of Lemma C.3 . . . . .               | 15        |
| 22 | D.2 Proof of Lemma C.7 . . . . .               | 15        |
| 23 | D.3 Technical details of Theorem A.1 . . . . . | 16        |

**Notation.** We use  $\stackrel{d}{=}$  for two random variables that have the same distribution. Let  $\Phi(\cdot)$  denote the CDF of  $\mathcal{N}(0, 1)$ , and  $z_\alpha$  denote the upper  $\alpha$  quantile of  $\mathcal{N}(0, 1)$ . The upper  $\alpha$  quantile of  $F$ -distribution with degrees of freedom  $(p, n - p)$  is denoted by  $q_{\alpha, p, n-p}$ . Moreover, the norm  $\|\cdot\|_2$  stands for Euclidean norm for a vector, and spectral norm for a matrix. Matrix Frobenius norm is denoted by  $\|\cdot\|_F$ . We call  $a_n \asymp b_n$  if there is a universal constant  $c_0$  such that  $\frac{1}{c_0} \leq \frac{a_n}{b_n} \leq c_0$  for large enough  $n$ , and  $a_n \lesssim b_n$  if  $a_n \leq c_0 b_n$  for large enough  $n$ .

## A Relaxation of Gaussian Assumptions

In this part, we show that the proposed sketching test is still valid under more general conditions for both data matrix and noise distribution. To do this, we invoke a new set of assumptions on  $\mathbf{X}_i$  and  $z_i$  in model (2), which hold beyond the Gaussian setting.

**(B1)** The design vectors are generated as  $\mathbf{x}_i = \mathbf{\Gamma} \mathbf{u}_i$ , where  $\mathbf{\Gamma} \in \mathbb{R}^{p \times m}$  satisfies  $\mathbf{\Gamma} \mathbf{\Gamma}^\top = \mathbf{\Sigma}$  and  $\mathbf{u}_1, \dots, \mathbf{u}_n$  are i.i.d. instances with  $\mathbb{E}[\mathbf{u}_i] = \mathbf{0}$  and  $\text{Var}[\mathbf{u}_i] = \mathbf{I}_m$  for some  $m \leq k$ . Additionally, we assume that  $\mathbf{u}_i$  satisfies

**(a) (polynomial tail)** There exists constant  $c, C > 0$  such that for any  $n \in \mathbb{N}$ , orthogonal projection  $P$  in  $\mathbb{R}^m$  and  $t > C \text{rank}(P)$ , we have  $\mathbb{P}(\|P \mathbf{u}_i\|^2 > t) \leq C t^{-1-c}$ ;

**(b) (bounded moment)** We have  $\sup_{\|v\|=1} (\mathbb{E}|v' \mathbf{u}_i|^8)^{1/8} = O(1)$  and for any symmetric matrix sequence  $\mathbf{M} \in \mathbb{R}^{m \times m}$ ,

$$\text{Var}[\mathbf{u}_i^\top \mathbf{M} \mathbf{u}_i] = O(\text{tr}(\mathbf{M}^2)) + o(\text{tr}^2(\mathbf{M})).$$

**(B2)** The noise vector  $\mathbf{z}$  is independent of design matrix, with  $\mathbb{E}[z_i^2] = 1$  and  $\mathbb{E}[z_i^4] \leq c$  for  $1 \leq i \leq n$  and some universal constant  $c > 0$ .

With this new set of assumptions, we are able to obtain similar results as in the Gaussian case. Theorem A.1 below, which builds on [7], includes Theorem 1 as a special case; we can also show Theorem 3 holds if we replace the Gaussian assumptions of  $\mathbf{X}$  and  $\mathbf{z}$  with (B1) and (B2).

**Theorem A.1.** Besides (B1) and (B2), assume  $\limsup k/n < 1$  and  $\beta^\top \mathbf{\Sigma} \beta = o(k/n)$ . Then, for almost all sequences of sketching matrix  $S_k$ , the power function  $\Psi^S(S_k) = P\{F(S_k) > q_{\alpha, k, n-k}\}$  of test (3) satisfies

$$\Psi_n^F - \Phi\left(-z_\alpha + \frac{\sqrt{n} \Delta_k^2}{\sigma^2} \sqrt{\frac{1 - k/n}{2k/n}}\right) \rightarrow 0.$$

The proof of the result shares the same spirit as the proof of Theorem 1; one major difference is that, when the design matrix is not Gaussian, sketched noise  $z_i^S$  is not independent of sketched data  $S_k \mathbf{X}_i$  anymore, requiring extra efforts to characterize the behavior of  $F(S_k)$ . We list some technical details in Section D.

**Remark:** We note that the assumptions (B1) and (B2) are mild. The moment and tail conditions hold for a wide range of random instances beyond Gaussian, including heavy-tailed ones such as log-normal. Also note that we do not require entries of  $\mathbf{u}_i$  to be independent to each other.

## B Formal version of Definition 1

In the following, we present a full version of Definition 1, which accounts for more general scenarios.

**Definition B.1.** We say model (2) has intrinsic dimension up to  $r$ , if we can find  $\eta = o(1)$  and  $r \leq p$ , such that

$$\begin{aligned} \left(\frac{1}{r} \sum_{i=1}^r \tilde{\beta}_i^2\right) \cdot \left(\sum_{i=r+1}^p \lambda_i\right) + \sum_{i=r+1}^p \tilde{\beta}_i^2 \lambda_i &\leq \eta \beta^\top \mathbf{\Sigma} \beta; \\ \left(\frac{1}{r} \sum_{i=1}^r \tilde{\beta}_i^2 + \frac{1}{p-r} \sum_{i=r+1}^p \tilde{\beta}_i^2\right) \cdot r \lambda_{r+1} &\leq \eta \beta^\top \mathbf{\Sigma} \beta. \end{aligned} \tag{1}$$

Denote the collection of such  $(\beta, \mathbf{\Sigma})$  as  $\mathcal{D}(r)$ .

Here quantities  $\eta$  and  $r$  are both sequences of parameters indexed by  $p$ . When each  $\tilde{\beta}_i$  follows the same distribution  $\mathcal{P}$ , the above conditions boil down to Definition 1.

## C Proof of results in main text

### C.1 Proof of Theorem 1

In order to complete the proof, we need to check the conditions in Lemma 1 under the sketched regression setting. For a fixed  $S_k$ , by the property of a conditional Gaussian distribution, we have

$$y_i | (\mathbf{X}'_i S_k) \sim N(\boldsymbol{\beta}^\top \boldsymbol{\Sigma} S_k (S_k^\top \boldsymbol{\Sigma} S_k)^{-1} S_k^\top \mathbf{X}_i, \nu^2),$$

with  $\nu^2 := \sigma^2 + \boldsymbol{\beta}^\top \boldsymbol{\Sigma} \boldsymbol{\beta} - \Delta_k^2$ . Additionally let us write  $\boldsymbol{\beta}^S := (S_k^\top \boldsymbol{\Sigma} S_k)^{-1} S_k^\top \boldsymbol{\Sigma} \boldsymbol{\beta}$ . Indeed Algorithm 1 aims to test whether

$$H_0^S : \boldsymbol{\beta}^S = \mathbf{0} \quad \text{versus} \quad H_1^S : \boldsymbol{\beta}^S \neq \mathbf{0}, \quad (2)$$

for the new regression model

$$y_i = \mathbf{X}'_i S_k \boldsymbol{\beta}^S + z_i^S, \quad (3)$$

where  $z_1^S, \dots, z_n^S$  are independent random errors with  $\text{Var}(z_i^S) = \nu^2$ . Furthermore, when  $S_k^\top \boldsymbol{\Sigma} S_k$  is invertible, the problem stated in (2) becomes equivalent to testing whether

$$H_0^S : S_k^\top \boldsymbol{\Sigma} \boldsymbol{\beta} = 0 \quad \text{versus} \quad H_1^S : S_k^\top \boldsymbol{\Sigma} \boldsymbol{\beta} \neq 0.$$

It is shown in [6] that  $\Delta_k^2 \leq \boldsymbol{\beta}^\top \boldsymbol{\Sigma} \boldsymbol{\beta}$ . Then we can show  $\Delta_k^2 = o(1)$  and  $\nu^2 = \sigma^2 + o(1)$ . Putting pieces together with Lemma 1 completes the proof.

### C.2 Proof of Lemma 1

We present the full proof of Lemma 1 in this section. First, write the second term inside  $\Phi(\cdot)$  as

$$\eta = \sqrt{\frac{(1-\delta)n}{2\delta}} \frac{\boldsymbol{\beta}^\top \boldsymbol{\Sigma} \boldsymbol{\beta}}{\sigma^2}. \quad (4)$$

We also define

$$\hat{\sigma}^2 = \frac{\mathbf{y}^\top (\mathbf{I}_p - \mathbf{X}(\mathbf{X}^\top \mathbf{X})^{-1} \mathbf{X}^\top) \mathbf{y}}{n-p} \quad \text{and} \quad T = \frac{\hat{\sigma}^2}{\sigma^2} \sqrt{\frac{n\delta(1-\delta)}{2}} (F-1).$$

The proof builds on the following two claims, which are proved at the end of this section.

$$\sqrt{n} \left( \frac{\hat{\sigma}^2}{\sigma^2} - 1 \right) = O_P(1) \quad \text{and} \quad (5)$$

$$T - \eta \xrightarrow{d} \mathcal{N}(0, 1). \quad (6)$$

We now continue the main line of the proof assuming the claims in (5) and (6) hold. By the claim (5) we know  $\hat{\sigma}^2/\sigma^2 \xrightarrow{P} 1$ . Note that  $\eta = o(\sqrt{n})$  under local alternative assumption. By Slutsky's theorem,

$$G := \sqrt{\frac{n\delta(1-\delta)}{2}} (F-1) - \eta = \frac{\sigma^2}{\hat{\sigma}^2} (T - \eta) + \left( \frac{\sigma^2}{\hat{\sigma}^2} - 1 \right) \eta \xrightarrow{d} \mathcal{N}(0, 1). \quad (7)$$

We can use the convergence result (7) to show the claim in Lemma 1. Additionally write

$$s := \sqrt{\frac{n\delta(1-\delta)}{2}} (q_{\alpha, p, n-p} - 1). \quad (8)$$

Notice that  $\Phi(\cdot)$  is Lipschitz-1 and thus we have

$$\begin{aligned} |\Psi_n^F - \Phi(-z_\alpha + \eta)| &= |\mathbb{P}(G \geq s - \eta) - \Phi(-z_\alpha + \eta)| \\ &\stackrel{(i)}{\leq} |\mathbb{P}(G \leq s - \eta) - \Phi(s - \eta)| + |\Phi(s - \eta) - \Phi(z_\alpha - \eta)| \\ &\stackrel{(ii)}{\leq} \sup_{x \in \mathbb{R}} |\mathbb{P}(G \leq x) - \Phi(x)| + |s - z_\alpha|, \end{aligned}$$

79 where step (i) uses the fact  $\Phi(x) = 1 - \Phi(-x)$  and step (ii) uses Lipschitz property of  $\Phi$ . To analyze  
 80 the second term, we need Lemma 2.1 of [1] which provides an approximation of  $q_{\alpha,p,n-p}$  when  
 81  $p = \delta n$  for  $\delta \in (0, 1)$ .

82 **Lemma C.1** (Lemma 2.1 of [1]). *When  $p = \delta n$  with  $\delta \in (0, 1)$ , we have*

$$q_{\alpha,p,n-p} = 1 + \sqrt{\frac{2}{n\delta(1-\delta)}} z_{\alpha} + o(n^{-1/2}).$$

83 Rearranging the statement of Lemma C.1 yields  $s = z_{\alpha} + o(1)$  where  $s$  is defined in (8). We also  
 84 know  $\sup_{x \in \mathbb{R}} |\mathbb{P}(G \leq x) - \Phi(x)| \rightarrow 0$  by the approximation (7). Combining these pieces yields  
 85  $|\Psi_n^F - \Phi(-z_{\alpha} + \eta)| = o(1)$  and thus Lemma 1 follows.

#### 86 **Proof of Claim (5)**

87 Write  $\mathbf{H} = \mathbf{X}(\mathbf{X}^{\top} \mathbf{X})^{-1} \mathbf{X}^{\top}$ . Notice that  $\mathbf{H} \mathbf{X} = \mathbf{X}$  and then  $(\mathbf{I}_p - \mathbf{H}) \mathbf{X} \boldsymbol{\beta} = \mathbf{0}$ . By the linearity  
 88 assumption  $\mathbf{y} = \mathbf{X} \boldsymbol{\beta} + \sigma \mathbf{z}$ , we can write

$$\frac{\hat{\sigma}^2}{\sigma^2} = \frac{(\mathbf{X} \boldsymbol{\beta} + \sigma \mathbf{z})^{\top} (\mathbf{I}_p - \mathbf{H}) (\mathbf{X} \boldsymbol{\beta} + \sigma \mathbf{z})}{(n-p)\sigma^2} = \frac{1}{n-p} \mathbf{z}^{\top} (\mathbf{I}_p - \mathbf{H}) \mathbf{z}. \quad (9)$$

89 Additionally, by our model assumption, the noise vector  $\mathbf{z} \sim \mathcal{N}(\mathbf{0}, \mathbf{I}_p)$  is independent of  $\mathbf{X}$ . For  
 90 any given  $\mathbf{X}$  with rank  $p$ ,  $\mathbf{I}_p - \mathbf{H}$  is a projection matrix with rank  $(n-p)$ , and in this case  
 91  $\mathbf{z}^{\top} (\mathbf{I}_p - \mathbf{H}) \mathbf{z} | \mathbf{H} \sim \chi_{n-p}^2$ . Under the Gaussian setting, we know  $\text{rank}(\mathbf{X}) = p$  almost surely, so  
 92  $\hat{\sigma}^2 / \sigma^2 \stackrel{d}{=} \chi_{n-p}^2 / (n-p)$ . Recall that  $p = \delta n$ , and thus  $\sqrt{n} (\chi_{n-p}^2 / (n-p) - 1) = O_P(1)$ , which in  
 93 turn leads to  $\sqrt{n} (\hat{\sigma}^2 / \sigma^2 - 1) = O_P(1)$ . This completes the proof of claim (5).

#### 94 **Proof of Claim (6)**

We first rearrange the expression of  $T$  in (6). By definition of  $T$  in (6), we have

$$T = \frac{\hat{\sigma}^2}{\sigma^2} \sqrt{\frac{n\delta(1-\delta)}{2}} (F-1) = \frac{\hat{\sigma}^2}{\sigma^2} \sqrt{\frac{n\delta(1-\delta)}{2}} \left( \frac{\mathbf{y}^{\top} \mathbf{H} \mathbf{y} / p}{\hat{\sigma}^2} - 1 \right) = \sqrt{\frac{n\delta(1-\delta)}{2}} \left( \frac{\mathbf{y}^{\top} \mathbf{H} \mathbf{y} / p}{\sigma^2} - \frac{\hat{\sigma}^2}{\sigma^2} \right).$$

95 Using the fact that  $\mathbf{H} \mathbf{X} = \mathbf{X}$ , we have

$$\mathbf{y}^{\top} \mathbf{H} \mathbf{y} = (\mathbf{X} \boldsymbol{\beta} + \sigma \mathbf{z})^{\top} \mathbf{H} (\mathbf{X} \boldsymbol{\beta} + \sigma \mathbf{z}) = \sigma^2 \mathbf{z}^{\top} \mathbf{H} \mathbf{z} + 2\sigma \boldsymbol{\beta}^{\top} \mathbf{X}^{\top} \mathbf{z} + \boldsymbol{\beta}^{\top} \mathbf{X}^{\top} \mathbf{X} \boldsymbol{\beta}.$$

96 Combining the above with another expression of  $\hat{\sigma}^2 / \sigma^2$  in (9), we can write  $T$  as

$$T = \sqrt{\frac{n\delta(1-\delta)}{2}} \left( \frac{\mathbf{z}^{\top} \mathbf{H} \mathbf{z}}{p} - \frac{\mathbf{z}^{\top} (\mathbf{I}_p - \mathbf{H}) \mathbf{z}}{n-p} + \frac{\boldsymbol{\beta}^{\top} \mathbf{X}^{\top} \mathbf{X} \boldsymbol{\beta}}{p\sigma^2} + \frac{2}{\sigma} \frac{\boldsymbol{\beta}^{\top} \mathbf{X}^{\top} \mathbf{z}}{p} \right).$$

97 By recalling  $\eta$  defined in (4), we can decompose  $T - \eta$  as  $T - \eta = T_1 + (T_2 - \eta) + T_3$ , where

$$\begin{aligned} T_1 &= \sqrt{\frac{n\delta(1-\delta)}{2}} \left( \frac{\mathbf{z}^{\top} \mathbf{H} \mathbf{z}}{p} - \frac{\mathbf{z}^{\top} (\mathbf{I}_p - \mathbf{H}) \mathbf{z}}{n-p} \right), \\ T_2 - \eta &= \eta \left( \frac{\boldsymbol{\beta}^{\top} \mathbf{X}^{\top} \mathbf{X} \boldsymbol{\beta}}{n\boldsymbol{\beta}^{\top} \boldsymbol{\Sigma} \boldsymbol{\beta}} - 1 \right) \quad \text{and} \\ T_3 &= \frac{1}{\sigma} \sqrt{\frac{2(1-\delta)}{n\delta}} \boldsymbol{\beta}^{\top} \mathbf{X}^{\top} \mathbf{z}. \end{aligned}$$

98 In what follows, we prove  $T_1 \xrightarrow{d} \mathcal{N}(0, 1)$ ,  $T_2 - \eta \xrightarrow{d} 0$  and  $T_3 \xrightarrow{d} 0$  and thus  $T - \eta \xrightarrow{d} \mathcal{N}(0, 1)$  as  
 99 desired.

100 **Analyzing  $T_1$ :** Note that  $\mathbf{H} = \mathbf{X}(\mathbf{X}^{\top} \mathbf{X})^{-1} \mathbf{X}^{\top}$  is a projection matrix with rank  $p$  almost surely.  
 101 Therefore, conditional on  $\mathbf{H}$ , we have  $\mathbf{z}^{\top} \mathbf{H} \mathbf{z} | \mathbf{H} \sim \chi_p^2$  and  $\mathbf{z}^{\top} (\mathbf{I} - \mathbf{H}) \mathbf{z} | \mathbf{H} \sim \chi_{n-p}^2$  and these are

independent to each other. By letting  $\omega_1, \omega_2 \stackrel{iid}{\sim} \mathcal{N}(0, 1)$ , we may apply the central limit theorem and see that

$$\begin{aligned} \mathbf{z}^\top \mathbf{H} \mathbf{z} / p | \mathbf{H} &= 1 + \omega_1 / \sqrt{p} + o_P(n^{-1/2}), \\ \mathbf{z}^\top (\mathbf{I} - \mathbf{H}) \mathbf{z} / (n - p) | \mathbf{H} &= 1 + \omega_2 / \sqrt{n - p} + o_P(n^{-1/2}). \end{aligned}$$

Then we conclude that  $T_1 | \mathbf{H} \xrightarrow{d} \mathcal{N}(0, 1)$  and thus  $T_1 \xrightarrow{d} \mathcal{N}(0, 1)$  as well by dominated convergence theorem.

**Analyzing  $T_2$ :** Since  $\mathbf{X} \boldsymbol{\beta} \sim \mathcal{N}(\mathbf{0}, (\boldsymbol{\beta}^\top \boldsymbol{\Sigma} \boldsymbol{\beta}) \mathbf{I}_p)$  under the Gaussian setting, it follows that

$$\eta \left( \frac{\boldsymbol{\beta}^\top \mathbf{X}^\top \mathbf{X} \boldsymbol{\beta}}{n \boldsymbol{\beta}^\top \boldsymbol{\Sigma} \boldsymbol{\beta}} - 1 \right) \stackrel{d}{=} \eta \left( \frac{\chi_n^2}{n} - 1 \right).$$

Together with observations (i)  $\eta = o(\sqrt{n})$  and (ii)  $\sqrt{n}(\chi_n^2/n - 1) = O_P(1)$ , we conclude  $T_2 - \eta \xrightarrow{d} 0$ .

**Analyzing  $T_3$ :** To show  $T_3 \xrightarrow{d} 0$ , it suffices to prove  $\boldsymbol{\beta}^\top \mathbf{X}^\top \mathbf{z} = o_P(\sqrt{n})$ . By the independence between  $\mathbf{X}$  and  $\mathbf{z}$ , we have  $\mathbb{E}[\boldsymbol{\beta}^\top \mathbf{X}^\top \mathbf{z}] = 0$  and  $\text{Var}(\boldsymbol{\beta}^\top \mathbf{X}^\top \mathbf{z}) = \mathbb{E}[\boldsymbol{\beta}^\top \mathbf{X}^\top \mathbf{z} \mathbf{z}^\top \mathbf{X} \boldsymbol{\beta}] = \mathbb{E}[\boldsymbol{\beta}^\top \mathbf{X}^\top \mathbf{X} \boldsymbol{\beta}] = n \boldsymbol{\beta}^\top \boldsymbol{\Sigma} \boldsymbol{\beta} = o(n)$ . Therefore  $\boldsymbol{\beta}^\top \mathbf{X}^\top \mathbf{z} = o_P(\sqrt{n})$  holds.

Combining the results, we complete the proof of claim (6).

### C.3 Well-definedness of Algorithm 1

In this part, we show that  $S_k^\top \mathbf{X}^\top \mathbf{X} S_k$  is invertible almost surely.

Since  $\text{rank}(\mathbf{A}^\top \mathbf{A}) = \text{rank}(\mathbf{A})$  for any matrix  $\mathbf{A}$ , we observe  $\text{rank}(S_k^\top \mathbf{X}^\top \mathbf{X} S_k) = \text{rank}(\mathbf{X} S_k)$ . For any realization of  $\mathbf{X}$  with no all-zero rows, the entries of  $\mathbf{X} S_k$  are independent Gaussian random variables and thus  $\mathbf{X} S_k$  has full-rank  $k$ . By construction,  $\mathbf{X}$  does not have all-zero rows almost surely, and thus  $\text{rank}(S_k^\top \mathbf{X}^\top \mathbf{X} S_k) = k$  almost surely.

### C.4 Proof of Proposition 1

Rearranging expression (8) in the main text, we have

$$\text{ARE}_n(\Psi_n^{ZC}; \Psi_n^S) = \left( \frac{4}{\sqrt{\rho(1-\rho)}} \frac{\text{tr}(\boldsymbol{\Sigma})}{\sqrt{\text{tr}(\boldsymbol{\Sigma}^2)}} \frac{1}{\sqrt{n}} \right) \cdot \left( \frac{\boldsymbol{\beta}^\top \boldsymbol{\Sigma} \boldsymbol{\beta}}{\Delta_k^2} \frac{k}{2p} \right) \cdot \left( \frac{\|\boldsymbol{\Sigma} \boldsymbol{\beta}\|^2}{\boldsymbol{\beta}^\top \boldsymbol{\Sigma} \boldsymbol{\beta}} \frac{p}{2\text{tr}(\boldsymbol{\Sigma})} \right),$$

where we recall that

$$\Delta_k^2 := \boldsymbol{\beta}^\top \boldsymbol{\Sigma} S_k (S_k^\top \boldsymbol{\Sigma} S_k)^{-1} S_k^\top \boldsymbol{\Sigma} \boldsymbol{\beta}.$$

The first term is exactly what we want; it remains to derive high-probability bounds for the second and third terms. Define

$$\mathcal{E}_1 = \left\{ \frac{\Delta_k^2}{\boldsymbol{\beta}^\top \boldsymbol{\Sigma} \boldsymbol{\beta}} \geq \frac{k}{2p} \right\} \quad \text{and} \quad \mathcal{E}_2 = \left\{ \frac{\|\boldsymbol{\Sigma} \boldsymbol{\beta}\|^2}{\boldsymbol{\beta}^\top \boldsymbol{\Sigma} \boldsymbol{\beta}} \leq \frac{2\text{tr}(\boldsymbol{\Sigma})}{p} \right\}.$$

If we can show  $\mathbb{P}(\mathcal{E}_1) \rightarrow 1$  and  $\mathbb{P}(\mathcal{E}_2) \rightarrow 1$  as  $n \rightarrow \infty$ , the claim of Proposition 1 follows.

The remaining parts of the proof rely on concentration bounds of Gaussian quadratic forms. See Lemma 0.2. in [2] for the proof of the following lemma:

**Lemma C.2 ([2]).** For any symmetric matrix  $\mathbf{A} \in \mathbb{R}^{p \times p}$  with  $\mathbf{A} \succeq 0$ ,  $\mathbf{Z} \sim \mathcal{N}(0, I_{p \times p})$  and any  $t > 0$ , we have

$$\begin{aligned} \mathbb{P}(\mathbf{Z}^\top \mathbf{A} \mathbf{Z} \geq \text{tr}(\mathbf{A}) + 2\|\mathbf{A}\|_F \sqrt{t} + 2\|\mathbf{A}\|t) &\leq \exp(-t) \quad \text{and} \\ \mathbb{P}(\mathbf{Z}^\top \mathbf{A} \mathbf{Z} \leq \text{tr}(\mathbf{A}) - 2\|\mathbf{A}\|_F \sqrt{t}) &\leq \exp(-t). \end{aligned}$$

We also state the useful matrix inequality used in the proof:

**Lemma C.3.** For a symmetric matrix  $\Sigma \in \mathbb{R}^{p \times p}$  and  $\Sigma \neq \mathbf{0}$ , we have

$$\frac{\text{tr}(\Sigma)}{\|\Sigma\|_F} \geq \left( \frac{\text{tr}^2(\Sigma^2)}{\text{tr}(\Sigma^4)} \right)^{1/8}.$$

129 The proof of Lemma C.3 can be found in Section D.1. Using Lemma C.2, we first show  $\mathbb{P}(\mathcal{E}_1) \rightarrow 1$ .  
 130 By assumption (A), we can write  $\Sigma^{1/2}\beta/\|\Sigma^{1/2}\beta\|_2$  as  $\mathbf{Z}/\|\mathbf{Z}\|_2$ , where  $\mathbf{Z} \sim \mathcal{N}(\mathbf{0}, \mathbf{I}_p)$ . Then

$$\frac{\Delta_k^2}{\beta^\top \Sigma \beta} = \frac{1}{\|\mathbf{Z}\|_2^2} \mathbf{Z}^\top \Sigma^{1/2} S_k (S_k^\top \Sigma S_k)^{-1} S_k^\top \Sigma^{1/2} \mathbf{Z} := \frac{1}{\|\mathbf{Z}\|_2^2} \mathbf{Z}^\top \mathbf{P} \mathbf{Z},$$

131 where we denote  $\mathbf{P} := \Sigma^{1/2} S_k (S_k^\top \Sigma S_k)^{-1} S_k^\top \Sigma^{1/2}$ . To apply the second statement of  
 132 Lemma C.2, we first calculate  $\text{tr}(\mathbf{P})$  and  $\|\mathbf{P}\|_F$ . By  $\text{tr}(\mathbf{A}\mathbf{B}) = \text{tr}(\mathbf{B}\mathbf{A})$ , it follows that  $\text{tr}(\mathbf{P}) =$   
 133  $\text{tr}((S_k^\top \Sigma S_k)^{-1} (S_k^\top \Sigma S_k)) = \text{tr}(\mathbf{I}_k) = k$ . Also notice that  $\mathbf{P}$  is a projection matrix with rank  $k$ ,  
 134 and then  $\|\mathbf{P}\|_F = \sqrt{\text{tr}(\mathbf{P}^\top \mathbf{P})} = \sqrt{\text{tr}(\mathbf{P})} = \sqrt{k}$ . By choosing  $t = \frac{3-2\sqrt{2}}{8}k$ , we have, for some  
 135 universal constant  $C > 0$ ,

$$\mathbb{P}\left(\mathbf{Z}^\top \mathbf{P} \mathbf{Z} \leq \frac{k}{\sqrt{2}}\right) \leq \exp(-Ck).$$

136 By the law of large numbers,  $\|\mathbf{Z}\|_2^2/p \rightarrow 1$  almost surely as  $p \rightarrow \infty$ . Thus  $\mathbb{P}(\|\mathbf{Z}\|_2^2 \geq \sqrt{2}p) \rightarrow 0$ .  
 137 By the above reasoning and the following lower bound

$$\mathbb{P}(\mathcal{E}_1) \geq 1 - \mathbb{P}\left(\|\mathbf{Z}\|_2^2 \geq \sqrt{2}p\right) + \mathbb{P}\left(\mathbf{Z}^\top \mathbf{P} \mathbf{Z} \leq \frac{k}{\sqrt{2}}\right),$$

138 we know  $\mathbb{P}(\mathcal{E}_1) \rightarrow 1$  as  $k \rightarrow \infty$  (recall that we assume  $p \geq n/2$  and  $k \rightarrow \infty$  as  $n \rightarrow \infty$ ).

139 We complete the proof by showing  $\mathbb{P}(\mathcal{E}_2) \rightarrow 1$ . Similar to the proof in the first part, we may write

$$\frac{\|\Sigma\beta\|^2}{\beta^\top \Sigma \beta} = \frac{1}{\|\mathbf{Z}\|^2} \mathbf{Z}^\top \Sigma \mathbf{Z}.$$

140 Slightly modifying the first statement of Lemma C.2 yields

$$\begin{aligned} \mathbb{P}\left(\mathbf{Z}^\top \Sigma \mathbf{Z} \geq \text{tr}(\Sigma) + 2\|\Sigma\|_F \sqrt{t_1} + 2\|\Sigma\|_2 t_2\right) &\leq \mathbb{P}\left(\mathbf{Z}^\top \Sigma \mathbf{Z} \geq \text{tr}(\Sigma) + 2\|\Sigma\|_F \sqrt{\min(t_1, t_2)} + 2\|\Sigma\|_2 \min(t_1, t_2)\right) \\ &\leq \exp(-\min(t_1, t_2)). \end{aligned}$$

141 Choose  $\sqrt{t_1} = \frac{\text{tr}(\Sigma)}{24\|\Sigma\|_F}$  and  $t_2 = \frac{\text{tr}(\Sigma)}{24\|\Sigma\|_2}$ . By  $\|\Sigma\|_F \geq \|\Sigma\|_2$ , we know  $\sqrt{t_1} \leq t_2$ . By Lemma C.3  
 142 and Condition (6), we observe  $\sqrt{t_1} \rightarrow \infty$  as  $p \rightarrow \infty$ . Then

$$\mathbb{P}\left(\mathbf{Z}^\top \Sigma \mathbf{Z} \geq \sqrt{2}\text{tr}(\Sigma)\right) \rightarrow 0, \quad p \rightarrow \infty.$$

143 Similar to the first part, we have

$$\mathbb{P}(\mathcal{E}_2) \geq 1 - \mathbb{P}(\|\mathbf{Z}\|^2 \geq \sqrt{2}p) - \mathbb{P}\left(\mathbf{Z}^\top \Sigma \mathbf{Z} \geq \sqrt{2}\text{tr}(\Sigma)\right).$$

144 Recall that we have shown  $\mathbb{P}(\|\mathbf{Z}\|^2 \geq \sqrt{2}p) \rightarrow 0$ , and thus it follows that  $\mathbb{P}(\mathcal{E}_2) \rightarrow 1$ .

## 145 C.5 Details of Example 1

146 With the recommended choice  $k = \lfloor n/2 \rfloor$ , expression (9) in the main text becomes

$$\text{ARE}_n(\Psi_n^{ZC}; \Psi_n^S) \leq 8 \frac{\text{tr}(\Sigma)}{\sqrt{\text{tr}(\Sigma^2)}} \frac{1}{\sqrt{n}}.$$

147 For Example 1, we have

$$\text{tr}(\Sigma^2) \geq \lambda_1^2 + \dots + \lambda_s^2 \stackrel{(i)}{\geq} (\lambda_1 + \dots + \lambda_s)^2/s \stackrel{(ii)}{\geq} (1-\epsilon)^2 \text{tr}^2(\Sigma)/s,$$

148 where step (i) follows by Cauchy-Schwarz inequality and step (ii) uses the condition  $\lambda_1 + \dots + \lambda_s \geq$   
 149  $(1-\epsilon) \cdot \text{tr}(\Sigma)$ . This inequality further implies that

$$\text{ARE}_n(\Psi_n^{ZC}; \Psi_n^S) \leq 8 \frac{\text{tr}(\Sigma)}{\sqrt{\text{tr}(\Sigma^2)}} \frac{1}{\sqrt{n}} \leq \frac{8\sqrt{s}}{(1-\epsilon)\sqrt{n}}.$$

150 With  $s = \sqrt{n}$ , we have  $\frac{8\sqrt{s}}{(1-\epsilon)\sqrt{n}} \asymp n^{-1/4}$  and then  $\text{ARE}_n(\Psi_n^{ZC}; \Psi_n^S) \lesssim n^{-1/4}$ .

## 151 C.6 Proof of Theorem 2

152 The key of showing the upper bound part in Theorem 2 and Theorem 3 is a high-probability  
 153 lower bound of the signal  $\Delta_k^2$ . Recall  $\Delta_k^2 \leq \beta^\top \Sigma \beta$ . The Lemma C.4 below shows that, when  
 154  $(\beta, \Sigma) \in \mathcal{D}(r)$  and sketching dimension is  $O(r)$ , the sketched model can capture most of signals in  
 155 the original model.

156 **Lemma C.4.** *When  $(\beta, \Sigma) \in \mathcal{D}(r)$  and  $r \leq k = O(r)$ , we have  $\Delta_k^2 / \beta^\top \Sigma \beta \xrightarrow{P} 1$ .*

157 We defer the proof of Lemma C.4 to Section C.9. With the conclusion of Lemma C.4, we then  
 158 establish Theorem 2 by first proving an information theoretic lower bound and then proving that our  
 159 test achieves this lower bound.

### 160 C.6.1 Lower bound

161 We start with the lower bound that is based on standard Le Cam's framework. Our argument is  
 162 particularly similar to that in [3]. Without loss of generality, we assume  $\sigma^2 = 1$ . First, we define a  
 163 new parameter class  $B_r(\tau)$  as

$$B_r(\tau) = \{\beta \in \mathbb{R}^p : \|\beta\|_2 \geq \tau, \beta_i = 0 \text{ for } r+1 \leq i \leq p\}.$$

164 By definition of  $\Theta_r(\tau)$ , we can easily see that for any  $\beta \in B_r(\tau)$  and  $\Sigma_0 = \text{diag}(\mathbf{1}_r, \mathbf{0}_{p-r})$ , it  
 165 follows  $(\beta, \Sigma_0) \in \Theta_r(\tau)$ . Then the minimax Type II error can be bounded by

$$\inf_{\psi} \sup_{\beta \in B_r(\tau)} \mathbb{P}_{\beta, \Sigma_0}(\psi = 0) \leq \mathcal{R}_r(\tau).$$

166 Let  $\mu$  be a probability measure on  $B_r(\tau)$ . Consider any family of probability measures  $P_\beta$  indexed  
 167 by  $\beta \in B_r(\tau)$ . Denote by  $\mathbb{P}_\mu$  the mixture probability measure

$$\mathbb{P}_\mu = \int_{B_r(\tau)} P_\beta \mu(d\beta).$$

168 Also let  $\chi^2(P', P) = \int (dP'/dP)^2 dP - 1$  be the chi-square divergence between two probability  
 169 measures  $P' \ll P$ . Then,

$$\begin{aligned} \alpha + \mathcal{R}_r(\tau) &\geq \inf_{\psi} \sup_{\beta \in B_r(\tau)} \{\mathbb{P}_0(\psi = 1) + \mathbb{P}_{\beta, \Sigma_0}(\psi = 0)\} \\ &\geq 1 - \sqrt{\chi^2(\mathbb{P}_\mu, P_0)}, \end{aligned}$$

170 in which the infimum is taken over all test functions based on  $(\mathbf{X}, \mathbf{y})$ . To show the lower bound, it  
 171 suffices to show that, for  $\tau = \tau(A, n) = \frac{Ar^{1/4}}{\sqrt{n}}$ , we can find  $\mu_\tau$  such that

$$\chi^2(\mathbb{P}_{\mu_\tau}, P_0) \leq 1 + o_A(1), \quad (10)$$

172 where  $o_A(1)$  tends to 0 as  $A \rightarrow 0$ .

173 Note that when  $\Sigma = \Sigma_0$ , data matrix  $\mathbf{X}$  under the null and alternative model only differs in the first  
 174  $r$  features. Thus the chi-square divergence is essentially the divergence between two  $r$ -dimensional  
 175 distributions, which allows us to borrow techniques for linear regression with  $\Sigma = \mathbf{I}_r$ . More  
 176 specifically, we may apply the results in Section 7.1 of [4] and observe that

$$\chi^2(\mathbb{P}_{\mu_\tau}, P_0) \leq \exp(A^2) \quad (11)$$

177 for some properly chosen  $\mu_\tau$ . See Section 7.1 of [4] or Section 4.4 of [3] for more details.

### 178 C.6.2 Upper bound

We now turn to the upper bound. Recall that we always assume  $\beta^\top \Sigma \beta = O(1)$ , since the problem is  
 trivial otherwise. In order to show the upper bound, following the definition (ii), it suffices to show,  
 if we choose  $\psi^S$  to be the sketched  $F$ -test in Algorithm 1 associated with any fixed sequence of  
 sketching matrix  $\{S_k\} \in \mathcal{A}$ , it holds that

$$r(\psi^S, \beta_n, \Sigma_n) = o_P(1), \quad \text{when } \tau_n/\epsilon_n \rightarrow \infty \text{ and } (\beta, \Sigma) \in \Theta_r(\tau).$$

179 For  $(\beta, \Sigma) \in \Theta_r(\tau)$ , by Chebyshev inequality, we have

$$\mathbb{E}_{\beta, \Sigma} [1 - \psi^S] = \mathbb{P}(F^S > q_{\alpha, k, n-k}) \leq \frac{\text{Var}_{\beta, \Sigma}(F^S)}{(q_{\alpha, k, n-k} - \mathbb{E}_{\beta, \Sigma}[F^S])^2}. \quad (12)$$

180 We claim that the following inequalities hold, and leave their proofs to the end of this section:

$$\text{Var}_{\beta, \Sigma}(F^S) \leq \frac{C}{r^2} \left[ \frac{r^2 + \lambda^2}{n} + (r + \lambda) \right] \quad \text{and} \quad (13)$$

$$(q_{\alpha, k, n-k} - \mathbb{E}_{\beta, \Sigma}[F^S])^2 \geq \frac{\lambda^2}{2r^2}, \quad (14)$$

181 for any fixed  $S_k \in \mathcal{A}$ . Here we define  $\lambda := n\Delta_k^2/\nu^2$  which satisfies  $\sqrt{r}/\lambda = o_P(1)$ . As a  
182 consequence of expression (13), we have

$$\mathbb{E}_{\beta, \Sigma} [1 - \psi^S] \leq C \frac{(r^2 + \lambda^2)/n + (r + \lambda)}{\lambda^2} = o_P(1).$$

183 This completes the proof.

184 **Proof of inequalities (13) and (14)**

185 We omit the subscript  $\beta$  and  $\Sigma$  of  $\text{Var}$  and  $\mathbb{E}$  for short. Recall that we define  $\beta^S =$   
186  $(S_k^\top \Sigma S_k)^{-1} S_k^\top \Sigma \beta$  and  $\nu^2 = \sigma^2 + \beta^\top \Sigma \beta - \Delta_k^2$ . Following the reasoning in the proof of Theo-  
187 rem 1, we have under  $H_1$ ,

$$F^S | \mathbf{X} \sim F_{k, n-k}(\lambda(\mathbf{X})) \quad \text{where} \quad \lambda(\mathbf{X}) = \frac{(\beta^S)^\top S_k^\top \mathbf{X}^\top \mathbf{X} S_k \beta^S}{\nu^2}.$$

188 By the moment expressions of a non-central  $F$ -statistic, it can be easily seen that

$$\mathbb{E}[F^S | \mathbf{X}] = \frac{(n-k)(k + \lambda(\mathbf{X}))}{k(n-k-2)},$$

$$\text{Var}(F^S | \mathbf{X}) = 2 \frac{(k + \lambda(\mathbf{X}))^2 + (k + 2\lambda(\mathbf{X}))(n-k-2)}{(n-k-2)^2(n-k-4)} \left( \frac{n-k}{k} \right)^2.$$

189 Then we have, with  $\lambda := \mathbb{E}[\lambda(\mathbf{X})] = n\Delta_k^2/\nu^2$  and  $\text{Var}(\lambda(\mathbf{X})) = 2\lambda^2/n$ ,

$$\text{Var}(\mathbb{E}[F^S | \mathbf{X}]) \leq \frac{2}{k^2} \text{Var}(\lambda(\mathbf{X})),$$

$$\mathbb{E}[\text{Var}(F^S | \mathbf{X})] \leq \frac{C}{k^2} \left[ \frac{(k + \lambda)^2}{n} + (k + \lambda) + \frac{\text{Var}(\lambda(\mathbf{X}))}{n} \right].$$

190 By the law of total variance,

$$\text{Var}(F^S) = \text{Var}(\mathbb{E}[F^S | \mathbf{X}]) + \mathbb{E}[\text{Var}(F^S | \mathbf{X})] \leq \frac{C}{k^2} \left[ \frac{(k + \lambda)^2}{n} + (k + \lambda) \right],$$

191 which proves inequality (13) under the assumption  $k \asymp r$ .

192 To prove inequality (14), notice that

$$\mathbb{E}[F^S] = \frac{(n-k)(k + \lambda)}{k(n-k-2)}.$$

193 In addition, Lemma C.8. of [7] yields

$$q_{\alpha, k, n-k} = 1 + \sqrt{\frac{2n}{k(n-k)}} z_\alpha + o(k^{-1/2}).$$

194 By the assumption  $\tau_n/\epsilon_n \rightarrow \infty$ , it follows  $\lambda \gg \sqrt{r}$ . After checking each term in  $(q_{\alpha, k, n-k} -$   
195  $\mathbb{E}[F^S])^2$ , we have

$$(q_{\alpha, k, n-k} - \mathbb{E}[F^S])^2 = \frac{\lambda^2}{k^2} (1 + o(1)),$$

196 which verifies inequality (14).



### 197 C.7 Proof of Theorem 3

198 By Theorem A.1 and Lemma C.4, it suffices to show that when  $\Delta_k^2/\beta^\top \Sigma \beta \xrightarrow{p} 1$ , we have

$$y_n := \Phi \left( -z_\alpha + \frac{\sqrt{n}\Delta_k^2}{\sigma^2} \sqrt{\frac{1-k/n}{2k/n}} \right) - \Phi \left( -z_\alpha + \frac{\sqrt{n}\beta^\top \Sigma \beta}{\sigma^2} \sqrt{\frac{1-k/n}{2k/n}} \right) \xrightarrow{p} 0. \quad (15)$$

199 For ease of notation, let us write  $a_n = \frac{\sqrt{n}\beta^\top \Sigma \beta}{\sigma^2} \sqrt{\frac{1-k/n}{2k/n}}$  and  $\eta_n = \frac{\beta^\top \Sigma \beta - \Delta_k^2}{\beta^\top \Sigma \beta}$ . Then we have  
200  $\eta_n \xrightarrow{p} 0$  and  $\eta_n \geq 0$ , due to the fact that  $\Delta_k^2 \leq \beta^\top \Sigma \beta$ . Assume  $n$  is large enough, such that  
201  $\eta_n \leq 1/2$ . By Lipschitz-1 property of  $\Phi(\cdot)$ , we have

$$|y_n| \leq \eta_n a_n. \quad (16)$$

202 On the other hand, we have

$$\begin{aligned} |y_n| &\stackrel{(i)}{\leq} \Phi \left( z_\alpha - \frac{\sqrt{n}\Delta_k^2}{\sigma^2} \sqrt{\frac{1-k/n}{2k/n}} \right) + \Phi \left( z_\alpha - \frac{\sqrt{n}\beta^\top \Sigma \beta}{\sigma^2} \sqrt{\frac{1-k/n}{2k/n}} \right) \\ &\leq 2\Phi \left( z_\alpha - \frac{\sqrt{n}\Delta_k^2}{\sigma^2} \sqrt{\frac{1-k/n}{2k/n}} \right) \\ &\stackrel{(ii)}{\leq} 2\Phi(z_\alpha - a_n/2) \\ &\stackrel{(iii)}{\leq} 2 \exp \left\{ -\frac{\mathbf{1}_{\{z_\alpha - a_n/2 \leq 0\}}(z_\alpha - a_n/2)^2}{2} \right\}, \end{aligned} \quad (17)$$

203 where step (i) is due to  $\Phi(x) - \Phi(y) \leq |\Phi(x) - \Phi(y)| = |\Phi(-x) - \Phi(-y)| \leq \Phi(-x) + \Phi(-y)$ , step  
204 (ii) follows from  $\eta_n \leq 1/2$  and step (iii) uses the Gaussian tail bound  $\Phi(x) \leq 2 \exp(-\mathbf{1}_{\{x \leq 0\}} x^2/2)$ .

205 Combining inequalities (16) and (17), we have

$$|y_n| \leq \min \left\{ \eta_n a_n, 2 \exp \left\{ -\frac{\mathbf{1}_{\{z_\alpha - a_n/2 \leq 0\}}(z_\alpha - a_n/2)^2}{2} \right\} \right\}.$$

206 Given  $\eta_n > 0$ , we know  $\eta_n a_n$  and  $2 \exp \left\{ -\frac{\mathbf{1}_{\{z_\alpha - a_n/2 \leq 0\}}(z_\alpha - a_n/2)^2}{2} \right\}$  are monotone increasing  
207 and decreasing respectively as functions of  $a_n$ . Then we have the upper bound

$$|y_n| \leq 2 \exp \left\{ -\frac{\mathbf{1}_{\{z_\alpha - f(\eta_n)/2 \leq 0\}}(z_\alpha - f(\eta_n)/2)^2}{2} \right\}, \quad (18)$$

208 where  $f(\eta_n)$  is the unique  $x_n$  that solves

$$\eta_n x_n = 2 \exp \left\{ -\frac{\mathbf{1}_{\{z_\alpha - x_n/2 \leq 0\}}(z_\alpha - x_n/2)^2}{2} \right\}.$$

209 We can directly check that  $f(\eta_n)$  is a monotone decreasing function of  $\eta_n$ , and  $\lim_{\eta_n \rightarrow 0^+} f(\eta_n) = +\infty$ .

210 Then

$$\lim_{\eta_n \rightarrow 0^+} 2 \exp \left\{ -\frac{\mathbf{1}_{\{z_\alpha - f(\eta_n)/2 \leq 0\}}(z_\alpha - f(\eta_n)/2)^2}{2} \right\} = 0.$$

211 By bound (18), it follows that  $y_n \xrightarrow{p} 0$ . This completes the proof of Theorem 3.

### 212 C.8 Details of Examples 2

213 In this section, we provide details of Examples 2 with  $\eta = 1/\log p$ . Note that for the first two cases,  
214 the conditions in Definition B.1 essentially boil down to that in (10) in the main text.

215 For the  $\alpha$ -polynomial decay case, notice that

$$\sum_{i=r+1}^p \lambda_i \asymp r^{-\alpha+1}, \quad \sum_{i=1}^p \lambda_i \asymp 1.$$

216 Then the conditions translate to  $r^{-\alpha+1} \leq 1/\log p$ , or equivalently, there exists  $r \lesssim (\log p)^{\frac{1}{\alpha-1}}$  such  
 217 that  $(\beta, \Sigma) \in \mathcal{D}(r)$ .

For the  $\gamma$ -exponential decay example, first note that  $\lambda_k/\lambda_{k+1} = \exp((k+1)^\gamma - k^\gamma)$  by definition. When  $\gamma \geq 1$ , we have  $\lambda_k/\lambda_{k+1} \geq e \geq 1 + 1/k$ ; whereas  $0 < \gamma < 1$ , we have

$$(k+1)^\gamma - k^\gamma = \gamma \int_k^{k+1} x^{\gamma-1} dx \geq \gamma(k+1)^{\gamma-1} \geq \frac{\gamma}{k}.$$

218 Thus  $\lambda_k/\lambda_{k+1} \geq 1 + \gamma/k$ . In either case, we know  $\{\lambda_k\}$  decays faster than  $(\gamma \wedge 1)/k$ . Then observe  
 219 that

$$\sum_{i=r+1}^p \lambda_i \leq \lambda_r \sum_{i=r+1}^p \frac{\gamma \wedge 1}{i} \lesssim \exp(-r^\gamma)(\log p), \quad \sum_{i=1}^p \lambda_i \asymp 1.$$

220 Thus the conditions translate to  $\exp(-r^\gamma)(\log p) \leq 1/\log p$  and  $r \exp(-r^\gamma) \leq 1/\log p$ , or there  
 221 exists  $r \lesssim (\log \log p)^{\frac{1}{\gamma}}$  such that  $(\beta, \Sigma) \in \mathcal{D}(r)$  as stated in Table 1 in the main file.

For the structured coefficient example, we know that

$$\sum_{i=1}^r \tilde{\beta}_i \asymp \log r, \quad \sum_{i=r+1}^p \lambda_i \asymp \log p - \log r, \quad \sum_{i=r+1}^p \tilde{\beta}_i^2 \lambda_i \asymp 1/r, \quad \beta^\top \Sigma \beta \asymp 1.$$

222 Then the first condition of Definition B.1 is now  $\log r(\log p - \log r)/r + 1/r \leq 1/\log p$ , or  $r \geq$   
 223  $\log^2 p \log r$ . Thus we can see that there exists  $r \lesssim (\log p)^3$  satisfying both conditions.

## 224 C.9 Proof of Lemma C.4

225 First we introduce some additional notation. In the SVD decomposition  $\Sigma = U \Lambda U^\top$ , write  $U =$   
 226  $[U_r \ U_{p-r}]$  and  $\Lambda = \begin{bmatrix} \Lambda_r & \\ & \Lambda_{p-r} \end{bmatrix}$ , where  $U_r \in \mathbb{R}^{p \times r}$  and  $\Lambda_r \in \mathbb{R}^{r \times r}$ . Then  $\Sigma = U_r \Lambda_r U_r^\top +$   
 227  $U_{p-r} \Lambda_{p-r} U_{p-r}^\top := \Sigma_r + \Sigma_{p-r}$ .

228 The intuition comes from low-rank case. If  $\text{rank}(\Sigma) = r$ , using sketching dimension  $k = r$  is  
 229 enough. To see this, notice that when  $\text{rank}(\Sigma) = r$ , we have  $\text{rank}(\Sigma S_k) = r$  almost surely,  
 230 i.e.,  $\Sigma S_k$  is of full-rank almost surely. Then  $\exists \xi \in \mathbb{R}^p$ , such that  $\Sigma \beta = \Sigma S_k \xi$ . It follows that  
 231  $\Delta_k^2 = \beta^\top \Sigma S_k (S_k^\top \Sigma S_k)^{-1} S_k^\top \Sigma S_k \xi = \beta^\top \Sigma \beta$ .

232 In general case, we may not be able to find  $\xi$  satisfying  $\Sigma \beta = \Sigma S_k \xi$ , and we seek for some  $\xi$  to  
 233 make the difference between  $\Sigma \beta$  and  $\Sigma S_k \xi$  small. Formally, as long as sketching dimension  $k \geq r$ ,  
 234 for any  $\xi$  that satisfies

$$U_r^\top \beta = U_r^\top S_k \xi, \tag{19}$$

235 define  $\nu = \Sigma_{p-r}(\beta - S_k \xi)$ . Then  $\Sigma \beta = \Sigma S_k \xi + \nu$ , and

$$\begin{aligned} \Delta_k^2 &= (\xi^\top S_k^\top \Sigma + \nu^\top) S_k (S_k^\top \Sigma S_k)^{-1} S_k^\top (\Sigma S_k \xi + \nu) \\ &\geq \beta^\top \Sigma \beta - (\beta - S_k \xi)^\top \Sigma_{p-r} (\beta - S_k \xi) \\ &\geq \beta^\top \Sigma \beta - (\beta - S_k \xi)^\top \Sigma_{p-r}^+ (\beta - S_k \xi) \end{aligned}$$

236 for any  $\Sigma_{p-r}^+ \succeq \Sigma_{p-r}$ , where the first inequality follows by positive semi-definite property of  
 237  $S_k (S_k^\top \Sigma S_k)^{-1} S_k^\top$ . When  $k \geq r$ , we have  $\text{rank}(U_r^\top S_k) = r$  almost surely, so such  $\xi$  exists. To  
 238 optimize the results, we seek for a solution of the problem

$$\min_{\xi} (\beta - S_k \xi)^\top \Sigma_{p-r}^+ (\beta - S_k \xi) \quad \text{s.t.} \quad U_r^\top (\beta - S_k \xi) = 0.$$

The optimal  $\xi^*$  can be obtained by Lagrange multiplier. With Lagrange function

$$\mathcal{L}(\xi, \lambda) = \frac{1}{2} (\beta - S_k \xi)^\top \Sigma_{p-r}^+ (\beta - S_k \xi) - \lambda^\top U_r^\top (\beta - S_k \xi),$$

239 by solving the following two equations

$$\frac{\partial \mathcal{L}(\xi, \lambda)}{\partial \lambda} = 0 \quad \text{and} \quad U_r^\top (\beta - S_k \xi) = 0, \tag{20}$$

240 we can solve for  $\xi^*$ . The following lemma gives an upper bound on  $(\beta - S_k \xi^*)^\top \Sigma_{p-r}^+ (\beta - S_k \xi^*)$ :

241 **Lemma C.5.** Write  $\tilde{S}_1 = U_r^\top S_k$ ,  $\tilde{S}_2 = U_{p-r}^\top S_k$ ,  $\tilde{\beta}_1 = U_r^\top \beta$  and  $\tilde{\beta}_2 = U_{p-r}^\top \beta$ . With  $\xi^*$  in (20),  
 242 we have  $(\beta - S_k \xi^*)^\top \Sigma_{p-r}^+ (\beta - S_k \xi^*) \leq L_1 + L_2$ , where

$$\begin{aligned} L_1 &= \frac{\|\tilde{S}_2^\top \Lambda_{p-r}^+ \tilde{S}_2\|_2}{\lambda_{\min}(\tilde{S}_1 \tilde{S}_1^\top)} \|\tilde{\beta}_1\|_2^2, \\ L_2 &= \left(1 + \kappa(\tilde{S}_2^\top \Lambda_{p-r}^+ \tilde{S}_2) \kappa(\tilde{S}_1 \tilde{S}_1^\top)\right) \cdot \tilde{\beta}_2^\top \Lambda_{p-r}^+ \tilde{\beta}_2. \end{aligned} \quad (21)$$

243 Here  $\kappa(\cdot)$  represents the condition number of matrix, i.e.,  $\kappa(\mathbf{A}) = \lambda_{\max}(\mathbf{A})/\lambda_{\min}(\mathbf{A})$ .

244 To analyze the terms on the right hand side of (21), we make use of the following lemma.

245 **Lemma C.6.** For  $\forall a > 1$ , if we choose sketching dimension to be  $ar \leq k \leq C_1 \frac{\sum_{i=r+1}^p \lambda_i}{\lambda_{r+1}}$ , then  
 246 with probability at least  $1 - \exp(-c_2 r) - \exp(-c_1 \frac{\sum_{i=r+1}^p \lambda_i}{\lambda_{r+1}})$ , we obtain

- 247 1.  $\kappa(\tilde{S}_2^\top \Lambda_{p-r} \tilde{S}_2) \leq 4$ ;
- 248 2.  $\lambda_{\max}(\tilde{S}_2^\top \Lambda_{p-r} \tilde{S}_2) \leq 2 \sum_{i=r+1}^p \lambda_i$ ;
- 249 3.  $\kappa(\tilde{S}_1 \tilde{S}_1^\top) \leq C_2$ ;
- 250 4.  $\lambda_{\min}(\tilde{S}_1 \tilde{S}_1^\top) \geq C_2^{-1} k$ ,

251 where  $c_1, c_2, C_1, C_2$  are universal constants only depending on  $a$ .

252 The proof of Lemma C.6 can be found at the end of this section. Now suppose that Lemma C.6 is  
 253 given and also assume that  $ar \leq k \leq br$  with  $a > 1$ .

254 By Lemma C.5, we have

$$\beta^\top \Sigma \beta - \Delta_k^2 \leq \frac{2\|\tilde{S}_2^\top \Lambda_{p-r}^+ \tilde{S}_2\|_2}{\lambda_{\min}(\tilde{S}_1 \tilde{S}_1^\top)} \|\tilde{\beta}_1\|_2^2 + 2 \left(1 + \kappa(\tilde{S}_2^\top \Lambda_{p-r}^+ \tilde{S}_2) \kappa(\tilde{S}_1 \tilde{S}_1^\top)\right) \cdot \tilde{\beta}_2^\top \Lambda_{p-r}^+ \tilde{\beta}_2.$$

255 Here we write  $\Sigma_{p-r}^+ = U_{p-r}^\top \Lambda_{p-r}^+ U_{p-r}$ , with  $\Lambda_{p-r}^+ = \text{diag}(\lambda_{r+1}^+, \dots, \lambda_p^+)$ . Then by Lemma C.7,  
 256 when sketching dimension  $k$  satisfies  $ar \leq k \leq C_1 \sum_{i=r+1}^p \lambda_i^+ / \lambda_{r+1}^+$ , we have

$$\begin{aligned} \beta^\top \Sigma \beta - \Delta_k^2 &\leq \frac{4C_2 \sum_{i=r+1}^p \lambda_i^+}{k} \|\tilde{\beta}_1\|_2^2 + 2(1 + 4C_2) \cdot \tilde{\beta}_2^\top \Lambda_{p-r}^+ \tilde{\beta}_2 \\ &\leq C_3 \left( \left( \frac{1}{r} \sum_{i=1}^r \tilde{\beta}_i^2 \right) \cdot \left( \sum_{i=r+1}^p \lambda_i^+ \right) + \sum_{i=r+1}^p \tilde{\beta}_i^2 \lambda_i^+ \right) \end{aligned} \quad (22)$$

257 with probability at least  $1 - \exp(-c_2 r) - \exp(-c_1 \sum_{i=r+1}^p \lambda_i^+ / \lambda_{r+1}^+)$ . Note that the constant  $C_3$   
 258 here only depends on  $a$ .

259 Up to now, the derivations do not depend on the form of matrix  $\Sigma_{p-r}^+$ . Now we are ready to choose a  
 260 particular form of  $\Sigma_{p-r}^+$ , namely we can set

$$\Sigma_{p-r}^+ := U_{p-r}^\top \Lambda_{p-r}^+ U_{p-r} \quad \text{and} \quad \lambda_i^+ = \lambda_i + \frac{b}{C_1} \frac{r \lambda_{r+1}}{p-r}, \quad \text{for } r+1 \leq i \leq p. \quad (23)$$

Then direct calculations give

$$\frac{\sum_{i=r+1}^p \lambda_i^+}{\lambda_{r+1}^+} = \frac{\sum_{i=r+1}^p \lambda_i + \frac{b}{C_1} r \lambda_{r+1}}{\lambda_{r+1} + \frac{b}{C_1} \frac{r \lambda_{r+1}}{p-r}} \geq \frac{b}{C_1} r.$$

261 Plugging the expression of  $\lambda_i^+$  into (22) and then applying the conditions in Definition B.1 yield the  
 262 following result:

When sketching dimension  $k$  satisfies  $ar \leq k \leq br$ , we have with probability at least  $1 - 2 \exp(-c_3 r)$  that

$$1 - \frac{\Delta_k^2}{\beta^\top \Sigma \beta} \leq C_3 \left(1 + \frac{b}{C_1}\right) \eta = o(1).$$

Thus we finish the proof with the stronger conclusion  $\frac{\Delta_k^2}{\beta^\top \Sigma \beta} \xrightarrow{P} 1$ .

Now we are only left to prove Lemma C.6.

**Proof of Lemma C.6.** To establish Lemma C.6, we make use of the result below whose proof is provided in Section D.1.

**Lemma C.7.** Suppose  $\Lambda = \text{diag}(\lambda_1, \dots, \lambda_N)$  with  $\lambda_i \geq 0$ ,  $\|\lambda\|^2 > 0$  and  $S \in \mathbb{R}^{N \times n}$  is a standard Gaussian random matrix with  $n \leq N$ . Write  $\lambda = (\lambda_1, \dots, \lambda_N)$ . Then for  $t < 1$ ,

$$(1-t) \sqrt{\sum_{i=1}^N \lambda_i^2} \leq s_{\min}(\Lambda S) \leq s_{\max}(\Lambda S) \leq (1+t) \sqrt{\sum_{i=1}^N \lambda_i^2},$$

with probability at least  $1 - 9^n \cdot 2 \exp\left(-\min\left\{\frac{1}{16} \frac{\|\lambda\|_4^4}{\|\lambda\|_4^4} t^2, \frac{1}{4} \frac{\|\lambda\|_2^2}{\|\lambda\|_\infty^2} t\right\}\right)$ .

Applying Lemma C.7 to  $\Lambda_{p-r}^{1/2} \tilde{S}_2$  with sketching dimension  $k$  and  $t = 1/3$  yields

$$\kappa(\tilde{S}_2^\top \Lambda_{p-r} \tilde{S}_2) \leq 4 \quad \text{and} \quad \lambda_{\max}(\tilde{S}_2^\top \Lambda_{p-r} \tilde{S}_2) \leq 2 \sum_{i=r+1}^p \lambda_i \quad (24)$$

with probability at least  $1 - \exp\left(\ln 9 \cdot k - \min\left\{\frac{1}{144} \frac{(\sum_{i=r+1}^p \lambda_i)^2}{\sum_{i=r+1}^p \lambda_i^2}, \frac{1}{12} \frac{\sum_{i=r+1}^p \lambda_i}{\lambda_{r+1}}\right\}\right)$ . Since  $\frac{(\sum_{i=r+1}^p \lambda_i)^2}{\sum_{i=r+1}^p \lambda_i^2} \geq \frac{\sum_{i=r+1}^p \lambda_i}{\lambda_{r+1}}$ , (24) holds with probability at least  $1 - \exp\left(-c_1 \frac{\sum_{i=r+1}^p \lambda_i}{\lambda_{r+1}}\right)$  as long as  $k \leq C_1 \frac{\sum_{i=r+1}^p \lambda_i}{\lambda_{r+1}}$ .

Lemma C.7 can be used to bound all the four quantities in Lemma C.6. To obtain a better control for  $\kappa(\tilde{S}_1 \tilde{S}_1^\top)$  and  $\lambda_{\min}(\tilde{S}_1 \tilde{S}_1^\top)$  in terms of constants, we invoke the following lemma from [6]:

**Lemma C.8** (Lemma 4 of [6]). For  $k \leq p$ , let  $P_k \in \mathbb{R}^{k \times p}$  be a random matrix with i.i.d.  $\mathcal{N}(0, 1)$  entries. Then

$$\begin{aligned} \mathbb{P}\left(\lambda_{\max}\left(\frac{1}{p} P_k^\top P_k\right) \geq (1 + \sqrt{k/p} + t)^2\right) &\leq \exp(-pt^2/2); \\ \mathbb{P}\left(\lambda_{\min}\left(\frac{1}{p} P_k^\top P_k\right) \leq (1 - \sqrt{k/p} - t)^2\right) &\leq \exp(-pt^2/2). \end{aligned}$$

With constant  $a > 1$  and  $k \geq ar$ , we now apply Lemma C.8 to  $\tilde{S}_1$  and obtain that with probability at least  $1 - \exp(-c_2 r)$ ,

$$\kappa(\tilde{S}_1 \tilde{S}_1^\top) \leq C_2 \quad \text{and} \quad \lambda_{\min}(\tilde{S}_1 \tilde{S}_1^\top) \geq C_2^{-1} k \quad (25)$$

where  $c_2, C_2$  are universal constants only depending on  $a$ . This completes the proof of Lemma C.6.

## C.10 Proof of Lemma C.5

**Structure of the proof:** We prove Lemma C.5 following the Lagrange multiplier procedure discussed in the main text. We first derive the expression of  $\xi^*$  using the Lagrange multiplier; the explicit form of  $\xi^*$  is summarized in (26) and (27). Then we plug  $\xi^*$  into  $(\beta - S_k \xi^*)^\top \Sigma_{p-r} (\beta - S_k \xi^*)$ , and get its upper bound; see (28). The remaining part of the proof proceeds by bounding the terms in (28) based on properties of the spectral norm.

**Step 1: Finding minimal value of  $(\beta - S_k \xi^*)^\top \Sigma_{p-r} (\beta - S_k \xi^*)$ .**

Recall that we define the Lagrange form

$$\mathcal{L}(\xi, \lambda) = \frac{1}{2} (\beta - S_k \xi)^\top \Sigma_{p-r} (\beta - S_k \xi) - \lambda^\top U_r^\top (\beta - S_k \xi).$$

290 By solving the following two equations

$$\frac{\partial \mathcal{L}(\xi, \lambda)}{\partial \xi} = 0 \quad \text{and} \quad U_r^\top (\beta - S_k \xi) = 0,$$

291 we can obtain the optimal solution  $\xi^*$ .

292 First, let us consider the first equation

$$\frac{\partial \mathcal{L}(\xi, \lambda)}{\partial \xi} = 0.$$

293 A direct calculation yields

$$S_k^\top \Sigma_{p-r} S_k \xi - S_k^\top \Sigma_{p-r} \beta + S_k^\top U_r \lambda = 0.$$

294 Similar to proof in Section C.3 and by noting that  $\text{rank}(\Sigma_{p-r}) = p - r \geq k$ , we can show the matrix

295  $S_k^\top \Sigma_{p-r} S_k$  is invertible almost surely. Then the solution can be written explicitly as

$$\xi^* = (S_k^\top \Sigma_{p-r} S_k)^{-1} S_k^\top (\Sigma_{p-r} \beta - U_r \lambda^*). \quad (26)$$

296 By writing  $H = S_k (S_k^\top \Sigma_{p-r} S_k)^{-1} S_k^\top$  and plugging the above expression to the constraint condition

297  $U_r^\top (\beta - S_k \xi) = 0$ , we obtain the following equality:

$$U_r^\top \beta - U_r^\top H (\Sigma_{p-r} \beta - U_r \lambda^*) = 0.$$

298 Before preceding, we first justify that  $U_r^\top H U_r$  is invertible almost surely. Note that when

299  $S_k^\top \Sigma_{p-r} S_k$  is invertible, we have  $x^\top U_r^\top H U_r x = 0$  iff  $S_k^\top U_r x = 0$  iff  $x^\top U_r^\top S_k S_k^\top U_r x = 0$ .

300 Since  $S_k^\top U_r \in \mathbb{R}^{k \times r}$  is distributed as an i.i.d Gaussian sketching matrix, we conclude that

301  $\text{rank}(U_r^\top S_k S_k^\top U_r) = \text{rank}(S_k^\top U_r) = r$  almost surely with  $k \geq r$ . Now with  $S_k^\top \Sigma_{p-r} S_k$  invertible

302 and  $\text{rank}(U_r^\top S_k S_k^\top U_r) = r$  (which happens almost surely), we know that  $x^\top U_r^\top H U_r x = 0$  iff

303  $x = 0$ , or equivalently,  $U_r^\top H U_r$  is invertible.

304 Now we can safely write  $(U_r^\top H U_r)^{-1}$ . In this case,

$$\lambda^* = (U_r^\top H U_r)^{-1} (U_r^\top H \Sigma_{p-r} - U_r^\top) \beta. \quad (27)$$

305 Based on (26) and (27), we have

$$\begin{aligned} S_k \xi^* &= H (\Sigma_{p-r} \beta - U_r (U_r^\top H U_r)^{-1} (U_r^\top H \Sigma_{p-r} - U_r^\top) \beta) \\ &= H (\Sigma_{p-r} - U_r (U_r^\top H U_r)^{-1} U_r^\top (H \Sigma_{p-r} - \mathbf{I})) \beta. \end{aligned}$$

With the above expression at hand, we are ready to control quantity  $(\beta - S_k \xi^*)^\top \Sigma_{p-r} (\beta - S_k \xi^*)$ . For the sake of notational simplicity, let us write

$$G := U_r (U_r^\top H U_r)^{-1} U_r^\top.$$

306 Then we obtain the following equalities:

$$\begin{aligned} S_k \xi^* &= H (\Sigma_{p-r} - G (H \Sigma_{p-r} - \mathbf{I})) \beta; \\ \beta - S_k \xi^* &= (\mathbf{I} - H G) (\mathbf{I} - H \Sigma_{p-r}) \beta. \end{aligned}$$

307 Putting the pieces together yields

$$(\beta - S_k \xi^*)^\top \Sigma_{p-r} (\beta - S_k \xi^*) = \beta^\top (\mathbf{I} - \Sigma_{p-r} H) (\mathbf{I} - G H) \Sigma_{p-r} (\mathbf{I} - H G) (\mathbf{I} - H \Sigma_{p-r}) \beta.$$

308 **Step 2: Upper bounding the minimal value.**

309 By recalling the notation  $H = S_k (S_k^\top \Sigma_{p-r} S_k)^{-1} S_k^\top$ , we know  $H \Sigma_{p-r} H = H$  and  $G H G = G$ .

310 Then  $H \Sigma_{p-r} (\mathbf{I} - H \Sigma_{p-r}) = 0$ , and

$$\begin{aligned} (\beta - S_k \xi^*)^\top \Sigma_{p-r} (\beta - S_k \xi^*) &= \beta^\top (\mathbf{I} - \Sigma_{p-r} H) (\Sigma_{p-r} - G H \Sigma_{p-r} - \Sigma_{p-r} H G + G) (\mathbf{I} - H \Sigma_{p-r}) \beta \\ &= \beta^\top (\mathbf{I} - \Sigma_{p-r} H) (\Sigma_{p-r} + G) (\mathbf{I} - H \Sigma_{p-r}) \beta \\ &= \beta^\top \Sigma_{p-r} \beta - \beta^\top \Sigma_{p-r} H \Sigma_{p-r} \beta + \beta^\top (\mathbf{I} - \Sigma_{p-r} H) G (\mathbf{I} - H \Sigma_{p-r}) \beta \\ &\leq \beta^\top \Sigma_{p-r} \beta + \|(U_r^\top H U_r)^{-1}\|_2 \|U_r^\top \beta - U_r^\top H \Sigma_{p-r} \beta\|_2^2. \end{aligned}$$

By definition of  $\tilde{S}_1 := \mathbf{U}_r^\top S_k$  and  $\tilde{S}_2 := \mathbf{U}_{p-r}^\top S_k$ , we can see  $\tilde{S}_1$  and  $\tilde{S}_2$  are independent, and their entries are independent standard Gaussian random variables. Additionally denoting  $\tilde{\beta}_1 := \mathbf{U}_r^\top \beta$  and  $\tilde{\beta}_2 := \mathbf{U}_{p-r}^\top \beta$ , we can rewrite the above as

$$(\beta - S_k \xi^*)^\top \Sigma_{p-r} (\beta - S_k \xi^*) \leq \tilde{\beta}_2^\top \mathbf{A}_{p-r} \tilde{\beta}_2 + \|(\mathbf{U}_r^\top \mathbf{H} \mathbf{U}_r)^{-1}\|_2 \|\tilde{\beta}_1 - \tilde{S}_1 (\tilde{S}_2^\top \mathbf{A}_{p-r} \tilde{S}_2)^{-1} \tilde{S}_2^\top \mathbf{A}_{p-r} \tilde{\beta}_2\|_2^2. \quad (28)$$

With some algebra (see the details at the end of this section), it can be shown that

$$\|\tilde{\beta}_1 - \tilde{S}_1 (\tilde{S}_2^\top \mathbf{A}_{p-r} \tilde{S}_2)^{-1} \tilde{S}_2^\top \mathbf{A}_{p-r} \tilde{\beta}_2\|_2^2 \leq 2\|\tilde{\beta}_1\|_2^2 + 2\|\tilde{S}_1\|_2^2 \|(\tilde{S}_2^\top \mathbf{A}_{p-r} \tilde{S}_2)^{-1}\|_2; \quad (29)$$

$$\|(\mathbf{U}_r^\top \mathbf{H} \mathbf{U}_r)^{-1}\|_2 \leq \frac{\lambda_{\max}(\tilde{S}_2^\top \mathbf{A}_{p-r} \tilde{S}_2)}{\lambda_{\min}(\tilde{S}_1 \tilde{S}_1^\top)}. \quad (30)$$

Plugging inequalities (29) and (30) into (28) yields

$$\begin{aligned} & (\beta - S_k \xi^*)^\top \Sigma_{p-r} (\beta - S_k \xi^*) \\ & \stackrel{\text{by (29)}}{\leq} 2\|(\mathbf{U}_r^\top \mathbf{H} \mathbf{U}_r)^{-1}\|_2 \|\tilde{\beta}_1\|_2^2 + \left(1 + 2\|(\mathbf{U}_r^\top \mathbf{H} \mathbf{U}_r)^{-1}\|_2 \|\tilde{S}_1\|_2^2 \|(\tilde{S}_2^\top \mathbf{A}_{p-r} \tilde{S}_2)^{-1}\|_2\right) \cdot \tilde{\beta}_2^\top \mathbf{A}_{p-r} \tilde{\beta}_2 \\ & \stackrel{\text{by (30)}}{\leq} 2 \frac{\|\tilde{S}_2^\top \mathbf{A}_{p-r} \tilde{S}_2\|_2}{\lambda_{\min}(\tilde{S}_1 \tilde{S}_1^\top)} \|\tilde{\beta}_1\|_2^2 + \left(1 + 2 \frac{\lambda_{\max}(\tilde{S}_2^\top \mathbf{A}_{p-r} \tilde{S}_2)}{\lambda_{\min}(\tilde{S}_2^\top \mathbf{A}_{p-r} \tilde{S}_2)} \cdot \frac{\lambda_{\max}(\tilde{S}_1 \tilde{S}_1^\top)}{\lambda_{\min}(\tilde{S}_1 \tilde{S}_1^\top)}\right) \cdot \tilde{\beta}_2^\top \mathbf{A}_{p-r} \tilde{\beta}_2 \\ & = 2 \frac{\|\tilde{S}_2^\top \mathbf{A}_{p-r} \tilde{S}_2\|_2}{\lambda_{\min}(\tilde{S}_1 \tilde{S}_1^\top)} \|\tilde{\beta}_1\|_2^2 + \left(1 + 2\kappa(\tilde{S}_2^\top \mathbf{A}_{p-r} \tilde{S}_2) \kappa(\tilde{S}_1 \tilde{S}_1^\top)\right) \cdot \tilde{\beta}_2^\top \mathbf{A}_{p-r} \tilde{\beta}_2. \end{aligned}$$

This completes the proof of Lemma C.5.

**Proof of (29) and (30).** First we show (29). By the triangle inequality, we have

$$\|\tilde{\beta}_1 - \tilde{S}_1 (\tilde{S}_2^\top \mathbf{A}_{p-r} \tilde{S}_2)^{-1} \tilde{S}_2^\top \mathbf{A}_{p-r} \tilde{\beta}_2\|_2^2 \leq 2\|\tilde{\beta}_1\|_2^2 + 2\|\tilde{S}_1 (\tilde{S}_2^\top \mathbf{A}_{p-r} \tilde{S}_2)^{-1} \tilde{S}_2^\top \mathbf{A}_{p-r} \tilde{\beta}_2\|_2^2.$$

Note that for  $\mathbf{A} \in \mathbb{R}^{p \times p}$  and  $\mathbf{x} \in \mathbb{R}^p$ , the multiplicative property of the norm shows  $\|\mathbf{A}\mathbf{x}\|_2 \leq \|\mathbf{A}\|_2 \|\mathbf{x}\|_2$ . Using this property, it can be seen that

$$\|\tilde{S}_1 (\tilde{S}_2^\top \mathbf{A}_{p-r} \tilde{S}_2)^{-1} \tilde{S}_2^\top \mathbf{A}_{p-r} \tilde{\beta}_2\|_2^2 \leq \|\tilde{S}_1\|_2^2 \|(\tilde{S}_2^\top \mathbf{A}_{p-r} \tilde{S}_2)^{-1} \tilde{S}_2^\top \mathbf{A}_{p-r}^{1/2}\|_2^2 \|\mathbf{A}_{p-r}^{1/2} \tilde{\beta}_2\|_2^2.$$

By  $\|\mathbf{A}\mathbf{A}^\top\|_2 = \|\mathbf{A}\|_2^2$ , it follows that

$$\|(\tilde{S}_2^\top \mathbf{A}_{p-r} \tilde{S}_2)^{-1} \tilde{S}_2^\top \mathbf{A}_{p-r}^{1/2}\|_2^2 = \|(\tilde{S}_2^\top \mathbf{A}_{p-r} \tilde{S}_2)^{-1}\|_2.$$

Then we have

$$\|\tilde{\beta}_1 - \tilde{S}_1 (\tilde{S}_2^\top \mathbf{A}_{p-r} \tilde{S}_2)^{-1} \tilde{S}_2^\top \mathbf{A}_{p-r} \tilde{\beta}_2\|_2^2 \leq 2\|\tilde{\beta}_1\|_2^2 + 2\|\tilde{S}_1\|_2^2 \|(\tilde{S}_2^\top \mathbf{A}_{p-r} \tilde{S}_2)^{-1}\|_2.$$

It remains to show (30). By definition, for a symmetric matrix  $\mathbf{A}$ , we can write  $\lambda_{\min}(\mathbf{A}) = \min_{\|\mathbf{x}\|_2=1} \mathbf{x}^\top \mathbf{A} \mathbf{x}$ . Taking  $\forall \mathbf{x} \in \mathbb{R}^r$  with  $\|\mathbf{x}\|_2 = 1$ , we have

$$\begin{aligned} \mathbf{x}^\top \mathbf{U}_r^\top \mathbf{H} \mathbf{U}_r \mathbf{x} &= \mathbf{x}^\top \mathbf{U}_r^\top S_k (S_k^\top \Sigma_{p-r} S_k)^{-1} S_k^\top \mathbf{U}_r \mathbf{x} = \mathbf{x}^\top \tilde{S}_1 (\tilde{S}_2^\top \mathbf{A}_{p-r} \tilde{S}_2)^{-1} \tilde{S}_1^\top \mathbf{x} \\ &\geq \lambda_{\min}((\tilde{S}_2^\top \mathbf{A}_{p-r} \tilde{S}_2)^{-1}) (\mathbf{x}^\top \tilde{S}_1 \tilde{S}_1^\top \mathbf{x}) \\ &\geq \lambda_{\min}((\tilde{S}_2^\top \mathbf{A}_{p-r} \tilde{S}_2)^{-1}) \lambda_{\min}(\tilde{S}_1 \tilde{S}_1^\top) = \frac{\lambda_{\min}(\tilde{S}_1 \tilde{S}_1^\top)}{\lambda_{\max}(\tilde{S}_2^\top \mathbf{A}_{p-r} \tilde{S}_2)}. \end{aligned}$$

Then we know

$$\|(\mathbf{U}_r^\top \mathbf{H} \mathbf{U}_r)^{-1}\|_2 = \frac{1}{\lambda_{\min}(\mathbf{U}_r^\top \mathbf{H} \mathbf{U}_r)} \leq \frac{\lambda_{\max}(\tilde{S}_2^\top \mathbf{A}_{p-r} \tilde{S}_2)}{\lambda_{\min}(\tilde{S}_1 \tilde{S}_1^\top)}.$$

## D Auxiliary proofs

### D.1 Proof of Lemma C.3

Let us write the singular value decomposition of  $\Sigma$  as  $\Sigma = U\Lambda U^\top$  with  $\Lambda = \text{diag}(\lambda)$ ,  $\lambda \in \mathbb{R}^p$ . Then we have  $\text{tr}(\Sigma) = \|\lambda\|_1$ ,  $\|\Sigma\|_F = \|\lambda\|_2$ ,  $\text{tr}(\Sigma^2) = \|\lambda\|_2^2$  and  $\text{tr}(\Sigma^4) = \|\lambda\|_4^4$ . With the new notation, the claim of Lemma C.3 is now equivalent to  $\|\lambda\|_1^2 \|\lambda\|_4 \geq \|\lambda\|_2^3$ .

We prove  $\|\lambda\|_1^2 \|\lambda\|_4 \geq \|\lambda\|_2^3$  using the following ingredients:

- (i)  $\|\lambda\|_3^3 \|\lambda\|_1 \geq \|\lambda\|_2^4$ ;
- (ii)  $\|\lambda\|_4^4 \|\lambda\|_1 \geq \|\lambda\|_3^3 \|\lambda\|_2^2$ ;
- (iii)  $\|\lambda\|_1 \geq \|\lambda\|_2$ ,

where (i) holds directly from Cauchy-Schwarz inequality; (ii) follows from the equality

$$\|\lambda\|_4^4 \|\lambda\|_1 - \|\lambda\|_3^3 \|\lambda\|_2^2 = \frac{1}{2} \sum_{i \neq j} \lambda_i \lambda_j (\lambda_i + \lambda_j) (\lambda_i - \lambda_j)^2 \geq 0$$

with  $\lambda_i \geq 0$ ; (iii) follows from the observation that  $\|\lambda\|_1^2 - \|\lambda\|_2^2 = \sum_{i \neq j} \lambda_i \lambda_j \geq 0$  with  $\lambda_i \geq 0$ .

Then we have

$$\|\lambda\|_1^8 \|\lambda\|_4^4 = \left( \frac{\|\lambda\|_1 \|\lambda\|_4^4}{\|\lambda\|_3^3} \right) \cdot (\|\lambda\|_1 \|\lambda\|_3^3) \cdot (\|\lambda\|_1^6) \geq \|\lambda\|_2^2 \cdot \|\lambda\|_2^4 \cdot \|\lambda\|_2^6 = \|\lambda\|_2^{12}.$$

Thus we show  $\|\lambda\|_1^2 \|\lambda\|_4 \geq \|\lambda\|_2^3$ , and Lemma C.3 follows.

### D.2 Proof of Lemma C.7

We closely follow the proof of Theorem 5.39 in [8] that uses a covering argument with three steps: 1) discretization; 2) concentration; 3) union bound. In the discretization step, we discretize the problem using a net  $\mathcal{N}$ ; in the concentration step, we bound  $\|\mathbf{A}\mathbf{x}\|_2$  for each  $\mathbf{x} \in \mathcal{N}$ . Finally, we use the union bound to establish a concentration bound over  $\mathbf{x} \in \mathcal{S}^{n-1}$ .

**Step 1: Discretization.** First we invoke Lemma 5.36 in [8]:

**Lemma D.1.** *Consider a matrix  $\mathbf{B}$  that satisfies*

$$\|\mathbf{B}^\top \mathbf{B} - \mathbf{I}\|_2 \leq \max(\delta, \delta^2)$$

for some  $\delta > 0$ . Then

$$1 - \delta \leq s_{\min}(\mathbf{B}) \leq s_{\max}(\mathbf{B}) \leq 1 + \delta.$$

Conversely, if  $\mathbf{B}$  satisfies  $1 - \delta \leq s_{\min}(\mathbf{B}) \leq s_{\max}(\mathbf{B}) \leq 1 + \delta$  for some  $\delta > 0$ , then  $\|\mathbf{B}^\top \mathbf{B} - \mathbf{I}\|_2 \leq 3 \max(\delta, \delta^2)$ .

Write  $T = \|\Lambda\|_2^2$  and  $\mathbf{A} = \Lambda \mathbf{S}$ . Then the claim is equivalent to

$$\left\| \frac{1}{T} \mathbf{A}^\top \mathbf{A} - \mathbf{I} \right\|_2 \leq \max(t, t^2) = t.$$

We can evaluate the operator norm on a  $1/4$ -net  $\mathcal{N}$  of the unit sphere  $\mathcal{S}^{n-1}$ : with Lemma 5.4 in [8], we have

$$\left\| \frac{1}{T} \mathbf{A}^\top \mathbf{A} - \mathbf{I} \right\|_2 \leq 2 \max_{\mathbf{x} \in \mathcal{N}} \left| \frac{1}{T} \|\mathbf{A}\mathbf{x}\|_2^2 - 1 \right|.$$

Note that we can choose  $\mathcal{N}$  such that  $|\mathcal{N}| \leq 9^n$ .

349 **Step 2: Concentration.** Fix  $\mathbf{x} \in \mathcal{S}^{n-1}$ . Denote the  $i$ -th row of matrix  $\mathbf{A}$  and  $\mathbf{S}$  by  $\mathbf{A}_i$  and  $\mathbf{S}_i$ ,  
 350 respectively. Then  $\langle \mathbf{A}_i, \mathbf{x} \rangle / \lambda_i = \langle \mathbf{S}_i, \mathbf{x} \rangle \sim \mathcal{N}(0, 1)$  and the  $\langle \mathbf{A}_i, \mathbf{x} \rangle$ 's are independent to each other.  
 351 We can express  $\|\mathbf{A}\mathbf{x}\|_2^2$  as a sum of independent random variables

$$\|\mathbf{A}\mathbf{x}\|_2^2 = \sum_{i=1}^N \langle \mathbf{A}_i, \mathbf{x} \rangle^2 =: \sum_{i=1}^N \lambda_i^2 Z_i^2,$$

352 where  $Z_i \stackrel{iid}{\sim} \mathcal{N}(0, 1)$ . By Lemma 1 of [5], we have

$$P \left( \left| \frac{1}{\sum_{i=1}^N \lambda_i^2} \|\mathbf{A}\mathbf{x}\|_2^2 - 1 \right| \geq 2 \frac{\sqrt{\sum_{i=1}^N \lambda_i^4}}{\sum_{i=1}^N \lambda_i^2} \sqrt{\delta} + 2 \frac{\max_{1 \leq i \leq N} \lambda_i^2}{\sum_{i=1}^N \lambda_i^2} \delta \right) \leq 2e^{-\delta}.$$

353 When  $\delta = \min \left\{ \frac{1}{16} \frac{\|\lambda\|_4^4}{\|\lambda\|_4^4} t^2, \frac{1}{4} \frac{\|\lambda\|_2^2}{\|\lambda\|_\infty^2} t \right\}$ , we have  $2 \frac{\sqrt{\sum_{i=1}^N \lambda_i^4}}{\sum_{i=1}^N \lambda_i^2} \sqrt{\delta} \leq \frac{1}{2} t$  and  $2 \frac{\max_{1 \leq i \leq N} \lambda_i^2}{\sum_{i=1}^N \lambda_i^2} \delta \leq \frac{1}{2} t$ .  
 354 Then we can rewrite the tail bound as

$$P \left( \left| \frac{1}{\sum_{i=1}^N \lambda_i^2} \|\mathbf{A}\mathbf{x}\|_2^2 - 1 \right| \geq t \right) \leq 2 \exp \left( - \min \left\{ \frac{1}{16} \frac{\|\lambda\|_4^4}{\|\lambda\|_4^4} t^2, \frac{1}{4} \frac{\|\lambda\|_2^2}{\|\lambda\|_\infty^2} t \right\} \right).$$

355 **Step 3: Union bound.** Taking the bound over all vectors in the net  $\mathcal{N}$ , we obtain

$$P \left( \max_{\mathbf{x} \in \mathcal{N}} \left| \frac{1}{T} \|\mathbf{A}\mathbf{x}\|_2^2 - 1 \right| \geq t \right) \leq 9^n \cdot 2 \exp \left( - \min \left\{ \frac{1}{16} \frac{\|\lambda\|_4^4}{\|\lambda\|_4^4} t^2, \frac{1}{4} \frac{\|\lambda\|_2^2}{\|\lambda\|_\infty^2} t \right\} \right).$$

356 Thus, by Lemma D.1, we have, for  $t < 1$ ,

$$(1-t) \sqrt{\sum_{i=1}^N \lambda_i^2} \leq s_{\min}(\mathbf{A}) \leq s_{\max}(\mathbf{A}) \leq (1+t) \sqrt{\sum_{i=1}^N \lambda_i^2}$$

357 with probability at least  $1 - 9^n \cdot 2 \exp \left( - \min \left\{ \frac{1}{16} \frac{\|\lambda\|_4^4}{\|\lambda\|_4^4} t^2, \frac{1}{4} \frac{\|\lambda\|_2^2}{\|\lambda\|_\infty^2} t \right\} \right)$ .

### 358 D.3 Technical details of Theorem A.1

359 In this part we check some technical details of Theorem A.1. Recall from the proof of Theorem 1  
 360 that the sketched linear model is

$$y_i = \langle \tilde{\mathbf{x}}_i, \boldsymbol{\beta}^S \rangle + z_i^S = \langle S_k^\top \mathbf{x}_i, \boldsymbol{\beta}^S \rangle + z_i^S,$$

where  $z_i^S = \langle \mathbf{x}_i, \boldsymbol{\beta} \rangle + \sigma z_i - \langle \tilde{\mathbf{x}}_i, \boldsymbol{\beta}^S \rangle$  and  $\boldsymbol{\beta}^S = (S_k^\top \boldsymbol{\Sigma} S_k)^{-1} S_k^\top \boldsymbol{\Sigma} \boldsymbol{\beta}$ . We are essentially testing  
 whether sketched coefficients  $\boldsymbol{\beta}^S$  are zero or not as

$$H_0^S : \boldsymbol{\beta}^S = 0 \quad \text{versus} \quad H_1^S : \boldsymbol{\beta}^S \neq 0.$$

361 In what follows, we verify that the technical conditions of Theorem 2.1 and Corollary 2.2 in [7] are  
 362 satisfied under assumptions (B1, B2) and the sketched model  $y_i = \langle \tilde{\mathbf{x}}_i, \boldsymbol{\beta}^S \rangle + z_i^S$ . This verification  
 363 step directly leads to the desired result in Theorem A.1. See Section 2.1 of [7] for the technical  
 364 conditions; specifically, it suffices to verify (A1)(a,b,c,d) and (A2) therein. We write them as  
 365 (S-A1)(a,b,c,d) and (S-A2) below.

366 **Verification of (S-A1):** By our assumption (B1) with  $\tilde{\mathbf{x}}_i = S_k^\top \Gamma \mathbf{u}_i$ , we can directly see assump-  
 367 tions (S-A1)(a,b,c,d) are satisfied.

368 **Verification of (S-A2):** It suffices to check the following two conditions:

$$\mathbb{E} \left[ \left( \mathbb{E} \left[ (z_i^S)^4 | \tilde{\mathbf{x}}_i \right] \right)^2 \right] = O(1) \quad \text{and} \quad \max_{i=1}^n \mathbb{E} [(z_i^S)^4 | \tilde{\mathbf{x}}_i] = o_P(\sqrt{k}). \quad (31)$$



**First claim of (31).** To simplify notation, write  $\delta := \beta - S_k \beta^S$ . Then we can write

$$z_i^S = \sigma z_i + \delta' x_i.$$

369 We first derive the expression for  $\mathbb{E}[(z_i^S)^4 | \tilde{x}_i]$ . Notice that  $\mathbb{E}[(z_i^S)^4 | \tilde{x}_i] = \mathbb{E}[\mathbb{E}[(z_i^S)^4 | x_i] | \tilde{x}_i]$ , with

$$\mathbb{E}[(z_i^S)^4 | x_i] = \mathbb{E}[(\sigma z_i + \delta' x_i)^4 | x_i] \leq 8c\sigma^4 + 8(\delta' x_i)^4. \quad (32)$$

370 The above inequality follows by  $(x+y)^4 \leq 8(x^4 + y^4)$  as well as assumption **(B2)**. Then we further  
371 have

$$\mathbb{E} \left[ \left( \mathbb{E}[(z_i^S)^4 | \tilde{x}_i] \right)^2 \right] = \mathbb{E} \left[ \left( 8c\sigma^4 + 8\mathbb{E}[(\delta' x_i)^4 | \tilde{x}_i] \right)^2 \right] \leq 128 \left( c^2 \sigma^8 + \mathbb{E} \left[ \left( \mathbb{E}[(\delta' x_i)^4 | \tilde{x}_i] \right)^2 \right] \right). \quad (33)$$

372 To show the first claim in (31), it suffices to show  $\mathbb{E}[(\mathbb{E}[(\delta' x_i)^4 | \tilde{x}_i])^2] = O(1)$ . By  $\text{Var}(\mathbb{E}[Y|X]) \leq$   
373  $\text{Var}(Y)$ , we have

$$\begin{aligned} \mathbb{E} \left[ \left( \mathbb{E}[(\delta' x_i)^4 | \tilde{x}_i] \right)^2 \right] &= \text{Var} \left( \mathbb{E}[(\delta' x_i)^4 | \tilde{x}_i] \right) + \left( \mathbb{E} \left[ \mathbb{E}[(\delta' x_i)^4 | \tilde{x}_i] \right] \right)^2 \\ &\leq \text{Var} \left( (\delta' x_i)^4 \right) + \left( \mathbb{E}[(\delta' x_i)^4] \right)^2 = \mathbb{E}[(\delta' x_i)^8]. \end{aligned}$$

374 With  $\delta = \beta - S_k \beta^S$ , we also have

$$\mathbb{E}[(\delta' x_i)^8] = \mathbb{E}[\langle x_i, \beta - S_k \beta^S \rangle^8] \leq \|\Gamma^\top (\beta - S_k \beta^S)\|_2^8 \sup_{\|v\|_2=1} (\mathbb{E}|v' u_i|^8). \quad (34)$$

375 By definition of  $\beta^S$ , we know  $\|\Gamma^\top (\beta - S_k \beta^S)\|_2^2 = \beta^\top \Sigma \beta - \Delta_k^2 \leq \beta^\top \Sigma \beta = o(1)$ . By **(B1)(b)**, we  
376 further know  $\sup_{\|v\|=1} (\mathbb{E}|v' u_i|^8) = O(1)$ . Thus we show  $\mathbb{E}[(\mathbb{E}[(\delta' x_i)^4 | \tilde{x}_i])^2] = O(1)$ . Therefore,  
377 together with inequality (33), the first claim in (31) follows.

378 **Second claim of (31).** Next we show the second claim in (31). By inequality (32), we have

$$\max_{i=1}^n \mathbb{E}[(z_i^S)^4 | \tilde{x}_i] \leq 8c\sigma^4 + 8 \max_{i=1}^n \mathbb{E}[(\delta' x_i)^4 | \tilde{x}_i],$$

379 and it suffices to show that  $\max_{i=1}^n \mathbb{E}[(\delta' x_i)^4 | \tilde{x}_i] = o_P(\sqrt{k})$ . Observe that

$$\mathbb{P} \left( \max_{i=1}^n \mathbb{E}[(\delta' x_i)^4 | \tilde{x}_i] \geq \epsilon \right) \stackrel{(i)}{\leq} \frac{n}{\epsilon^2} \text{Var}((\delta' x_i)^4) \stackrel{(ii)}{\leq} n \beta^\top \Sigma \beta \frac{\sup_{\|v\|=1} (\mathbb{E}|v' u_i|^8)}{\epsilon^2} \stackrel{(iii)}{=} o \left( \frac{k}{\epsilon^2} \right).$$

380 In the above argument, step (i) follows from the union bound and Chebyshev's inequality; step (ii)  
381 is from (34) and  $\text{Var}((\delta' x_i)^4) \leq \mathbb{E}[(\delta' x_i)^8]$ ; step (iii) uses the local alternative  $\beta^\top \Sigma \beta = o(k/n)$   
382 and assumption **(B1)(b)**. Therefore we can conclude that  $\max_{i=1}^n \mathbb{E}[(\delta' x_i)^4 | \tilde{x}_i] = o_P(\sqrt{k})$ , which  
383 completes the proof.

## References

- [1] Zhidong Bai and Hewa Saranadasa. Effect of high dimension: by an example of a two sample problem. *Statistica Sinica*, pages 311–329, 1996.
- [2] Ikhlef Bechar. A bernstein-type inequality for stochastic processes of quadratic forms of gaussian variables. *arXiv preprint arXiv:0909.3595*, 2009.
- [3] Alexandra Carpentier, Olivier Collier, Laëtitia Comminges, Alexandre B Tsybakov, and Yuhao Wang. Minimax rate of testing in sparse linear regression. *arXiv preprint arXiv:1804.06494*, 2018.
- [4] Olivier Collier, Laëtitia Comminges, Alexandre B Tsybakov, et al. Minimax estimation of linear and quadratic functionals on sparsity classes. *The Annals of Statistics*, 45(3):923–958, 2017.
- [5] Beatrice Laurent and Pascal Massart. Adaptive estimation of a quadratic functional by model selection. *Annals of Statistics*, pages 1302–1338, 2000.
- [6] Miles Lopes, Laurent Jacob, and Martin J Wainwright. A more powerful two-sample test in high dimensions using random projection. In *Advances in Neural Information Processing Systems 24*, pages 1206–1214. Curran Associates, Inc., 2011.
- [7] Lukas Steinberger et al. The relative effects of dimensionality and multiplicity of hypotheses on the  $f$ -test in linear regression. *Electronic Journal of Statistics*, 10(2):2584–2640, 2016.
- [8] Roman Vershynin. Introduction to the non-asymptotic analysis of random matrices. *arXiv preprint arXiv:1011.3027*, 2010.
